# Supplementary material for: Mental health research in the Arab region in response to the COVID-19 pandemic: a scoping review
Source: HighWire-hosted journal article supplement (doi:10.1136/gpsych-2021-100590), 2022-03-31
Supplement: gpsych-2021-100590supp001_data_supplement.pdf [file gpsych-2021-100590supp001_data_supplement.pdf]

## Supplemental Material 1

**Supplemental Table 1. Characteristics of publications included in the review\***

| Study                                         | Type of publication   | Affiliation Country(ies)                | International Collaboration | Target Population                | Research Theme(s)                                                                                             |
|-----------------------------------------------|-----------------------|-----------------------------------------|-----------------------------|----------------------------------|---------------------------------------------------------------------------------------------------------------|
| (Shalash et al., 2020) <sup>[1]</sup>         | Case-control study    | Egypt                                   | No                          | Adults                           | Impact of COVID-19 and lockdown measures on non-COVID-19 patients mental health                               |
| (Iqbal et al., 2020) <sup>[2]</sup>           | Cross-sectional study | Qatar                                   | No                          | Adults                           | Mental health of patients with COVID-19                                                                       |
| (Samrah et al., 2020) <sup>[3]</sup>          | Cross-sectional study | Jordan                                  | No                          | Adults                           | Mental health of patients with COVID-19; Mental health of individuals in quarantines and isolation facilities |
| (Arafa, Mohamed, et al., 2021) <sup>[4]</sup> | Cross-sectional study | Egypt                                   | Yes                         | Adults                           | Impact of COVID-19 and lockdown measures on the general population                                            |
| (El-Zoghby et al., 2020) <sup>[5]</sup>       | Cross-sectional study | Egypt                                   | No                          | Adults                           | Impact of COVID-19 and lockdown measures on the general population                                            |
| (Al Omari et al., 2020) <sup>[6]</sup>        | Cross-sectional study | Egypt, Iraq, Jordan, Oman, Saudi Arabia | Yes                         | Adults; Children and Adolescents | Impact of COVID-19 and lockdown measures on the general population; Impact of COVID-19 and lockdown           |

\* Note: This table is inclusive of all publications regardless of their type or analysis-wise exclusion.

|                                                                           |                       |                                                     |     |                                 |                                                                                                                                       |
|---------------------------------------------------------------------------|-----------------------|-----------------------------------------------------|-----|---------------------------------|---------------------------------------------------------------------------------------------------------------------------------------|
|                                                                           |                       |                                                     |     |                                 | measures on Children and Adolescents                                                                                                  |
| (Ammar et al., 2020) <sup>[7]</sup>                                       | Cross-sectional study | Egypt, Jordan, Qatar, Tunisia, United Arab Emirates | Yes | Adults                          | Impact of COVID-19 and lockdown measures on the general population                                                                    |
| (Ahmad & Murad, 2020) <sup>[8]</sup>                                      | Cross-sectional study | Iraq                                                | No  | Adults                          | Impact of COVID-19 and lockdown measures on the general population; Psychological impact of COVID1-9-related social media consumption |
| (Alatrany, 2020) <sup>[9]</sup>                                           | Cross-sectional study | Iraq                                                | No  | Adults, Geriatrics/Older Adults | Impact of COVID-19 and lockdown measures on the general population                                                                    |
| (Abdel Jalil et al., 2020) <sup>[10]</sup>                                | Cross-sectional study | Jordan                                              | No  | Adults                          | Impact of COVID-19 and lockdown measures on the general population                                                                    |
| (Al-Tammemi et al., 2020) <sup>[11]</sup>                                 | Cross-sectional study | Jordan                                              | Yes | Adults                          | Impact of COVID19 and lockdown measures on students and education staff                                                               |
| (Sallam, Dababseh, Yaseen, Al-Haidar, Taim, et al., 2020) <sup>[12]</sup> | Cross-sectional study | Jordan                                              | Yes | Adults, Geriatrics/Older Adults | Impact of COVID-19 and lockdown measures on the general population                                                                    |
| (Alsaqri et al., 2020) <sup>[13]</sup>                                    | Cross-sectional study | Jordan, Saudi Arabia                                | No  | Adults                          | Impact of COVID-19 and lockdown measures on the general population                                                                    |
| (Alasousi et al., 2020) <sup>[14]</sup>                                   | Cross-sectional study | Kuwait                                              | No  | Adults                          | Impact of COVID-19 and lockdown measures on the general population; Psychological impact of COVID1-9-related social media consumption |

|                                                    |                       |              |     |                                  |                                                                                                                                       |
|----------------------------------------------------|-----------------------|--------------|-----|----------------------------------|---------------------------------------------------------------------------------------------------------------------------------------|
| (Öcal et al., 2020) <sup>[15]</sup>                | Cross-sectional study | Lebanon      | Yes | Adults                           | Impact of COVID-19 and lockdown measures on the general population                                                                    |
| (Sfendla & Hadrya, 2020) <sup>[16]</sup>           | Cross-sectional study | Morocco      | No  | Adults                           | Impact of COVID-19 and lockdown measures on the general population                                                                    |
| (Azizi et al., 2020) <sup>[17]</sup>               | Cross-sectional study | Morocco      | No  | Adults                           | Impact of COVID-19 and lockdown measures on the general population                                                                    |
| (Sameer et al., 2020) <sup>[18]</sup>              | Cross-sectional study | Saudi Arabia | Yes | Adults                           | Impact of COVID-19 and lockdown measures on the general population                                                                    |
| (Al-Musharaf, 2020) <sup>[19]</sup>                | Cross-sectional study | Saudi Arabia | No  | Adults                           | Impact of COVID-19 and lockdown measures on the general population; Impact of COVID-19 and lockdown measures on women's mental health |
| (Al-Qahtani et al., 2020) <sup>[20]</sup>          | Cross-sectional study | Saudi Arabia | No  | Adults                           | Impact of COVID-19 and lockdown measures on the general population                                                                    |
| (AlAteeq, Aljhani, & AlEesa, 2020) <sup>[21]</sup> | Cross-sectional study | Saudi Arabia | No  | Adults, Children and Adolescents | Impact of COVID19 and lockdown measures on students and education staff                                                               |
| (Alkhamees et al., 2020) <sup>[22]</sup>           | Cross-sectional study | Saudi Arabia | No  | Adults                           | Impact of COVID-19 and lockdown measures on the general population                                                                    |
| (Joseph et al., 2020) <sup>[23]</sup>              | Cross-sectional study | Saudi Arabia | No  | Adults                           | Impact of COVID-19 and lockdown measures on the general population                                                                    |
| (Alyami et al., 2020) <sup>[24]</sup>              | Cross-sectional study | Saudi Arabia | Yes | Adults                           | Impact of COVID-19 and lockdown measures on the general population                                                                    |

|                                                                              |                       |                                    |     |                          |                                                                                                                                                                                                                   |
|------------------------------------------------------------------------------|-----------------------|------------------------------------|-----|--------------------------|-------------------------------------------------------------------------------------------------------------------------------------------------------------------------------------------------------------------|
| (Mohamed-Azzam Zakout et al., 2020) <sup>[25]</sup>                          | Cross-sectional study | Saudi Arabia, Sudan                | No  | Adults                   | Impact of COVID-19 and lockdown measures on the general population; Psychological impact of COVID1-9-related social media consumption                                                                             |
| (Drissi et al., 2020) <sup>[26]</sup>                                        | Cross-sectional study | United Arab Emirates               | No  | Adults                   | Impact of COVID-19 and lockdown measures on students and education staff                                                                                                                                          |
| (Metwally et al., 2020) <sup>[27]</sup>                                      | Cross-sectional study | Egypt, Saudi Arabia                | No  | Children and Adolescents | Impact of COVID-19 and lockdown measures on students and education staff                                                                                                                                          |
| (Sallam, Dababseh, Yaseen, Al-Haidar, Ababneh, et al., 2020) <sup>[28]</sup> | Cross-sectional study | Jordan                             | Yes | Adults                   | Impact of COVID-19 and lockdown measures on the general population; Impact of COVID19 and lockdown measures on students and education staff                                                                       |
| (Alnasrallah & Alshehab, 2020) <sup>[29]</sup>                               | Cross-sectional study | Kuwait                             | No  | Adults                   | Impact of COVID-19 and lockdown measures on the general population                                                                                                                                                |
| (Saddik, Hussein, Albanna, et al., 2020) <sup>[30]</sup>                     | Cross-sectional study | Saudi Arabia, United Arab Emirates | No  | Adults                   | Impact of COVID-19 and lockdown measures on the general population; Impact of COVID-19 and lockdown measures on Children and Adolescents; Impact of COVID19 and lockdown measures on students and education staff |
| (Saddik, Hussein, Sharif-Askari, et al., 2020) <sup>[31]</sup>               | Cross-sectional study | Saudi Arabia, United Arab Emirates | No  | Adults                   | Impact of COVID19 and lockdown measures on students and education staff                                                                                                                                           |

|                                                 |                       |                                           |     |        |                                                                                         |
|-------------------------------------------------|-----------------------|-------------------------------------------|-----|--------|-----------------------------------------------------------------------------------------|
| (Slimani et al., 2020) <sup>[32]</sup>          | Cross-sectional study | Tunisia                                   | Yes | Adults | Impact of COVID-19 and lockdown measures on the general population                      |
| (Thomas & Barbato, 2020) <sup>[33]</sup>        | Cross-sectional study | United Arab Emirates                      | No  | Adults | Impact of COVID-19 and lockdown measures on the general population                      |
| (Elkholy et al., 2020) <sup>[34]</sup>          | Cross-sectional study | Egypt                                     | Yes | Adults | Impact of COVID-19 and lockdown measures on Front Line Healthcare workers mental health |
| (Arafa, Mohammed, et al., 2021) <sup>[35]</sup> | Cross-sectional study | Egypt, Saudi Arabia                       | Yes | Adults | Impact of COVID-19 and lockdown measures on Front Line Healthcare workers mental health |
| (Hendy et al., 2021) <sup>[36]</sup>            | Cross-sectional study | Egypt, Saudi Arabia, United Arab Emirates | No  | Adults | Impact of COVID-19 and lockdown measures on Front Line Healthcare workers mental health |
| (Abdulah & Mohammed, 2020) <sup>[37]</sup>      | Cross-sectional study | Iraq                                      | No  | Adults | Impact of COVID-19 and lockdown measures on Front Line Healthcare workers mental health |
| (Suleiman et al., 2020) <sup>[38]</sup>         | Cross-sectional study | Jordan                                    | No  | Adults | Impact of COVID-19 and lockdown measures on Front Line Healthcare workers mental health |
| (Hamdan Mansour et al., 2020) <sup>[39]</sup>   | Cross-sectional study | Jordan                                    | No  | Adults | Impact of COVID-19 and lockdown measures on Front Line Healthcare workers mental health |
| (Maraqa et al., 2020) <sup>[40]</sup>           | Cross-sectional study | Palestine                                 | Yes | Adults | Impact of COVID-19 and lockdown measures on Front                                       |

|                                                             |                       |                      |    |                                 |                                                                                                                                                                                                                 |
|-------------------------------------------------------------|-----------------------|----------------------|----|---------------------------------|-----------------------------------------------------------------------------------------------------------------------------------------------------------------------------------------------------------------|
|                                                             |                       |                      |    |                                 | Line Healthcare workers mental health                                                                                                                                                                           |
| (Ali et al., 2020) <sup>[41]</sup>                          | Cross-sectional study | Egypt                | No | Adults                          | Impact of COVID-19 and lockdown measures on Front Line Healthcare workers mental health                                                                                                                         |
| (Aly & Elchaghaby, 2020) <sup>[42]</sup>                    | Cross-sectional study | Egypt                | No | Adults                          | Impact of COVID-19 and lockdown measures on the general population                                                                                                                                              |
| (AlAteeq, Aljhani, Althiyabi, et al., 2020) <sup>[43]</sup> | Cross-sectional study | Saudi Arabia         | No | Adults                          | Impact of COVID-19 and lockdown measures on the general population                                                                                                                                              |
| (Alrubaiee et al., 2020) <sup>[44]</sup>                    | Cross-sectional study | Yemen                | No | Adults                          | Impact of COVID-19 and lockdown measures on the general population                                                                                                                                              |
| (Naser et al., 2020) <sup>[45]</sup>                        | Cross-sectional study | Jordan, Saudi Arabia | No | Adults, Geriatrics/Older Adults | Impact of COVID-19 and lockdown measures on the general population; Impact of COVID19 and lockdown measures on students and education staff; Impact of COVID-19 and lockdown measures on the general population |
| (Fawaz & Samaha, 2020a) <sup>[46]</sup>                     | Cross-sectional study | Lebanon              | No | Adults, Geriatrics/Older Adults | Mental health of individuals in quarantines and isolation facilities; Impact of COVID-19 and lockdown measures on the general population; Impact of COVID-19 and lockdown measures on the general population    |

|                                           |                       |                                             |     |        |                                                                                                                                                             |
|-------------------------------------------|-----------------------|---------------------------------------------|-----|--------|-------------------------------------------------------------------------------------------------------------------------------------------------------------|
| (Jahrami et al., 2021) <sup>[47]</sup>    | Cross-sectional study | Bahrain, Saudi Arabia, United Arab Emirates | No  | Adults | Impact of COVID-19 and lockdown measures on Front Line Healthcare workers mental health; Impact of COVID-19 and lockdown measures on the general population |
| (Hawari et al., 2020) <sup>[48]</sup>     | Cross-sectional study | Jordan                                      | No  | Adults | Impact of COVID-19 and lockdown measures on Front Line Healthcare workers mental health; Impact of COVID-19 and lockdown measures on the general population |
| (Alenazi et al., 2020) <sup>[49]</sup>    | Cross-sectional study | Lebanon, Saudi Arabia                       | Yes | Adults | Impact of COVID-19 and lockdown measures on Front Line Healthcare workers mental health; Impact of COVID-19 and lockdown measures on the general population |
| (Elhadi et al., 2020) <sup>[50]</sup>     | Cross-sectional study | Libya                                       | No  | Adults | Impact of COVID-19 and lockdown measures on Front Line Healthcare workers mental health; Impact of COVID-19 and lockdown measures on the general population |
| (Alshekaili et al., 2020) <sup>[51]</sup> | Cross-sectional study | Oman                                        | No  | Adults | Impact of COVID-19 and lockdown measures on Front Line Healthcare workers mental health; Impact of COVID-19 and lockdown                                    |

|                                             |                       |              |     |        |                                                                                                                                                             |
|---------------------------------------------|-----------------------|--------------|-----|--------|-------------------------------------------------------------------------------------------------------------------------------------------------------------|
|                                             |                       |              |     |        | measures on the general population                                                                                                                          |
| (Badahdah et al., 2020) <sup>[52]</sup>     | Cross-sectional study | Oman         | Yes | Adults | Impact of COVID-19 and lockdown measures on Front Line Healthcare workers mental health; Impact of COVID-19 and lockdown measures on the general population |
| (Abolfotouh et al., 2020) <sup>[53]</sup>   | Cross-sectional study | Saudi Arabia | No  | Adults | Impact of COVID-19 and lockdown measures on Front Line Healthcare workers mental health; Impact of COVID-19 and lockdown measures on the general population |
| (Al Sulais et al., 2020) <sup>[54]</sup>    | Cross-sectional study | Saudi Arabia | No  | Adults | Impact of COVID-19 and lockdown measures on Front Line Healthcare workers mental health; Impact of COVID-19 and lockdown measures on the general population |
| (M. H. Temsah et al., 2020) <sup>[55]</sup> | Cross-sectional study | Saudi Arabia | No  | Adults | Impact of COVID-19 and lockdown measures on Front Line Healthcare workers mental health; Impact of COVID-19 and lockdown measures on the general population |
| (M.-H. Temsah et al., 2020) <sup>[56]</sup> | Cross-sectional study | Saudi Arabia | No  | Adults | Impact of COVID-19 and lockdown measures on Front Line Healthcare workers                                                                                   |



|                                               |                       |                     |     |                                 |                                                                                                                                                                                                                                 |
|-----------------------------------------------|-----------------------|---------------------|-----|---------------------------------|---------------------------------------------------------------------------------------------------------------------------------------------------------------------------------------------------------------------------------|
|                                               |                       |                     |     |                                 | mental health; Impact of COVID-19 and lockdown measures on the general population                                                                                                                                               |
| (Halayem et al., 2020) <sup>[57]</sup>        | Cross-sectional study | Tunisia             | No  | Adults, Geriatrics/Older Adults | Impact of COVID-19 and lockdown measures on Front Line Healthcare workers mental health; Impact of COVID-19 and lockdown measures on the general population                                                                     |
| (Al-Hanawi et al., 2020) <sup>[58]</sup>      | Cross-sectional study | Saudi Arabia        | Yes | Adults, Geriatrics/Older Adults | Impact of COVID-19 and lockdown measures on the general population; Impact of COVID-19 and lockdown measures on Front Line Healthcare workers mental health; Impact of COVID-19 and lockdown measures on the general population |
| (Janati Idrissi et al., 2020) <sup>[59]</sup> | Cross-sectional study | Morocco, Qatar      | No  | Adults                          | Impact of COVID-19 and lockdown measures on the general population                                                                                                                                                              |
| (Z. M. Ahmed et al., 2020) <sup>[60]</sup>    | Cross-sectional study | Egypt, Saudi Arabia | Yes | Adults, Geriatrics/Older Adults | Impact of COVID-19 and lockdown measures on non-COVID-19 patients mental health                                                                                                                                                 |
| (Said & El-Shafei, 2020) <sup>[61]</sup>      | Cross-sectional study | Egypt               | No  | Adults                          | Impact of COVID-19 and lockdown measures on Front Line Healthcare workers mental health                                                                                                                                         |
| (Al Issa & Jaleel, 2021) <sup>[62]</sup>      | Cross-sectional study | Iraq, Oman          | No  | Adults                          | University staff                                                                                                                                                                                                                |

|                                            |                       |                |     |                                                           |                                                                                                                                                             |
|--------------------------------------------|-----------------------|----------------|-----|-----------------------------------------------------------|-------------------------------------------------------------------------------------------------------------------------------------------------------------|
| (Haider & Al-Salman, 2020) <sup>[63]</sup> | Cross-sectional study | Jordan         | No  | Adults                                                    | Impact of COVID19 and lockdown measures on students and education staff                                                                                     |
| (Shahrour & Dardas, 2020) <sup>[64]</sup>  | Cross-sectional study | Jordan         | No  | Adults                                                    | Impact of COVID-19 and lockdown measures on Front Line Healthcare workers mental health; Impact of COVID-19 and lockdown measures on the general population |
| (Olaimat et al., 2020) <sup>[65]</sup>     | Cross-sectional study | Jordan         | Yes | Adults                                                    | Impact of COVID19 and lockdown measures on students and education staff                                                                                     |
| (Al-Hashel & Ismail, 2020) <sup>[66]</sup> | Cross-sectional study | Kuwait         | No  | Adults                                                    | Impact of COVID-19 and lockdown measures on non-COVID-19 patients mental health;                                                                            |
| (Burhamah et al., 2020) <sup>[67]</sup>    | Cross-sectional study | Kuwait         | Yes | Adults, Children and Adolescents, Geriatrics/Older Adults | Impact of COVID-19 and lockdown measures on the general population                                                                                          |
| (Rahali et al., 2020) <sup>[68]</sup>      | Cross-sectional study | Morocco        | No  | Adults                                                    | Impact of COVID19 and lockdown measures on students and education staff                                                                                     |
| (Farrell et al., 2020) <sup>[69]</sup>     | Cross-sectional study | Qatar          | Yes | Adults                                                    | Impact of COVID-19 and lockdown measures on women's mental health                                                                                           |
| (Sediri et al., 2020) <sup>[70]</sup>      | Cross-sectional study | Qatar, Tunisia | No  | Adults                                                    | Impact of COVID-19 and lockdown measures on women's mental health                                                                                           |
| (M. A. Ahmed et al., 2020) <sup>[71]</sup> | Cross-sectional study | Saudi Arabia   | Yes | Adults                                                    | Impact of COVID-19 and lockdown measures on the general population                                                                                          |

|                                                         |                       |                      |     |                                 |                                                                                                                                                             |
|---------------------------------------------------------|-----------------------|----------------------|-----|---------------------------------|-------------------------------------------------------------------------------------------------------------------------------------------------------------|
| (Alkhotani et al., 2020) <sup>[72]</sup>                | Cross-sectional study | Saudi Arabia         | No  | Adults                          | Impact of COVID-19 and lockdown measures on non-COVID-19 patients mental health                                                                             |
| (Almater et al., 2020) <sup>[73]</sup>                  | Cross-sectional study | Saudi Arabia         | No  | Adults                          | Impact of COVID-19 and lockdown measures on the general population                                                                                          |
| (Tayyib & Alsolami, 2020) <sup>[74]</sup>               | Cross-sectional study | Saudi Arabia         | No  | Adults                          | Impact of COVID-19 and lockdown measures on Front Line Healthcare workers mental health; Impact of COVID-19 and lockdown measures on the general population |
| (Mosli et al., 2020) <sup>[75]</sup>                    | Cross-sectional study | Saudi Arabia         | No  | Adults                          | Impact of COVID-19 and lockdown measures on non-COVID-19 patients mental health                                                                             |
| (Hamad et al.,2020) <sup>[76]</sup>                     | Cross-sectional study | Saudi Arabia, Jordan | No  | Adults, Geriatrics/Older Adults | Impact of COVID-19 and lockdown measures on the general population                                                                                          |
| (Fekih-Romdhane, Ghrissi, et al., 2020) <sup>[77]</sup> | Cross-sectional study | Tunisia              | No  | Adults                          | Impact of COVID-19 and lockdown measures on the general population                                                                                          |
| (Fekih-Romdhane, Snene, et al., 2020) <sup>[78]</sup>   | Cross-sectional study | Tunisia              | No  | Adults                          | Impact of COVID-19 and lockdown measures on Front Line Healthcare workers mental health; Impact of COVID-19 and lockdown measures on the general population |
| (Vally, 2020) <sup>[79]</sup>                           | Cross-sectional study | United Arab Emirates | Yes | Adults                          | Impact of COVID-19 and lockdown measures on the                                                                                                             |

|                                              |                                      |                              |     |                                                           |                                                                                            |
|----------------------------------------------|--------------------------------------|------------------------------|-----|-----------------------------------------------------------|--------------------------------------------------------------------------------------------|
|                                              |                                      |                              |     |                                                           | general population; Impact of COVID19 and lckdown measures on sutdents and education staff |
| (Madani et al., 2020) <sup>[80]</sup>        | Cross-sectional study                | Algeria                      | Yes | Adults, Children and Adolescents, Geriatrics/Older Adults | Impact of COVID-19 and lockdown measures on the general population                         |
| (El Keshky et al., 2021) <sup>[81]</sup>     | Cross-sectional study                | Egypt, Saudi Arabia          | No  | Adults, Children and Adolescents, Geriatrics/Older Adults | Mental health of individuals in quarantines and isolation facilities                       |
| (Blbas et al., 2020) <sup>[82]</sup>         | Cross-sectional study                | Iraq                         | No  | Adults, Children and Adolescents, Geriatrics/Older Adults | Impact of COVID-19 and lockdown measures on the general population                         |
| (Alkeridy et al., 2020) <sup>[83]</sup>      | Case report                          | Saudi Arabia                 | Yes | N/A*                                                      | N/A*                                                                                       |
| (Abdelhafiz & Alorabi, 2020) <sup>[84]</sup> | Expert opinion                       | Egypt                        | No  | N/A*                                                      | N/A*                                                                                       |
| (Seidi et al., 2020) <sup>[85]</sup>         | Commentary/<br>Editorial<br>/Letter/ | Iraq                         | Yes | N/A*                                                      | N/A*                                                                                       |
| (Saniotis & Mohammadi, 2020) <sup>[86]</sup> | Commentary/<br>Editorial<br>/Letter/ | Iraq                         | Yes | N/A*                                                      | N/A*                                                                                       |
| (Al Gharaibeh, 2020) <sup>[87]</sup>         | Expert Opinion                       | Jordan, United Arab Emirates | No  | N/A*                                                      | N/A*                                                                                       |
| (Sakr & Romani, 2020) <sup>[88]</sup>        | Expert Opinion                       | Lebanon                      | No  | N/A*                                                      | N/A*                                                                                       |
| (Banjar & Alaqeel, 2020) <sup>[89]</sup>     | Commentary/<br>Editorial<br>/Letter/ | Saudi Arabia                 | No  | N/A*                                                      | N/A*                                                                                       |

|                                                        |                                      |                                 |     |        |                                                      |
|--------------------------------------------------------|--------------------------------------|---------------------------------|-----|--------|------------------------------------------------------|
| (Musa et al., 2021) <sup>[90]</sup>                    | Commentary/<br>Editorial<br>/Letter/ | Saudi Arabia,<br>Sudan          | Yes | N/A*   | N/A*                                                 |
| (Zgueb et al., 2020) <sup>[91]</sup>                   | Protocol                             | Tunisia                         | No  | N/A*   | N/A*                                                 |
| (Jaspal et al., 2020) <sup>[92]</sup>                  | Commentary/<br>Editorial<br>/Letter/ | Lebanon                         | Yes | N/A*   | N/A*                                                 |
| (B. Khoury et al., 2020) <sup>[93]</sup>               | Commentary/<br>Editorial<br>/Letter/ | Lebanon                         | Yes | N/A*   | N/A*                                                 |
| (El-Khatib et al., 2020) <sup>[94]</sup>               | Expert<br>Opinion                    | Jordan                          | Yes | N/A*   | N/A*                                                 |
| (R. Khoury & Karam,<br>2020) <sup>[95]</sup>           | Commentary/<br>Editorial<br>/Letter/ | Lebanon                         | No  | N/A*   | N/A*                                                 |
| (Hammoudeh, Jabr, et al.,<br>2020) <sup>[96]</sup>     | Commentary/<br>Editorial<br>/Letter/ | Palestine                       | Yes | N/A*   | N/A*                                                 |
| (Hammoudeh, Kienzler, et<br>al., 2020) <sup>[97]</sup> | Commentary/<br>Editorial<br>/Letter/ | Palestine                       | Yes | N/A*   | N/A*                                                 |
| (Al-Mahadin, 2020) <sup>[98]</sup>                     | Commentary/<br>Editorial<br>/Letter/ | Jordan                          | Yes | N/A*   | N/A*                                                 |
| (El Chammay & Roberts,<br>2020) <sup>[99]</sup>        | Commentary/<br>Editorial<br>/Letter/ | Lebanon                         | Yes | N/A*   | N/A*                                                 |
| (AlHumaid et al., 2020) <sup>[100]</sup>               | Commentary/<br>Editorial<br>/Letter/ | Saudi Arabia                    | No  | N/A*   | N/A*                                                 |
| (Algunmeeyn et al.,<br>2020) <sup>[101]</sup>          | Qualitative<br>Research              | Jordan, United<br>Arab Emirates | Yes | Adults | Impact of COVID-19 and<br>lockdown measures on Front |

|                                          |                      |         |    |        |                                                                                                                                                               |
|------------------------------------------|----------------------|---------|----|--------|---------------------------------------------------------------------------------------------------------------------------------------------------------------|
|                                          |                      |         |    |        | Line Healthcare workers mental health                                                                                                                         |
| (Fawaz & Samaha, 2020b) <sup>[102]</sup> | Qualitative Research | Lebanon | No | Adults | Mental health of individuals in quarantines and isolation facilities; Impact of COVID-19 and lockdown measures on Front Line Healthcare workers mental health |

\*N/A: Not Analyzed/Not Applicable for this type of publications

## Bibliography

- 1 Shalash A, Roushdy T, Essam M, *et al.* Mental Health, Physical Activity, and Quality of Life in Parkinson's Disease During COVID-19 Pandemic. *Mov Disord* 2020;**35**:1097–9. doi:10.1002/mds.28134
- 2 Iqbal Y, Al Abdulla MA, Albrahim S, *et al.* Psychiatric presentation of patients with acute SARS-CoV-2 infection: a retrospective review of 50 consecutive patients seen by a consultation-liaison psychiatry team. *BJPsych Open* 2020;**6**. doi:10.1192/bjo.2020.85
- 3 Samrah SM, Al-Mistarehi AH, Aleshawi AJ, *et al.* Depression and coping among covid-19-infected individuals after 10 days of mandatory in-hospital quarantine, irbid, jordan. *Psychol Res Behav Manag* 2020;**13**:823–30. doi:10.2147/PRBM.S267459
- 4 Arafa A, Mohamed A, Saleh L, *et al.* Psychological Impacts of the COVID-19 Pandemic on the Public in Egypt. *Community Ment Health J* 2021;**57**:64–9. doi:10.1007/s10597-020-00701-9
- 5 El-Zoghby SM, Soltan EM, Salama HM. Impact of the COVID-19 Pandemic on Mental Health and Social Support among Adult Egyptians. *J Community Health* 2020;**45**:689–95. doi:10.1007/s10900-020-00853-5
- 6 Al Omari O, Al Sabei S, Al Rawajfah O, *et al.* Prevalence and Predictors of Depression, Anxiety, and Stress among Youth at the Time of COVID-19: An Online Cross-Sectional Multicountry Study. *Depress Res Treat* 2020;**2020**. doi:10.1155/2020/8887727
- 7 Ammar A, Chtourou H, Boukhris O, *et al.* Social participation and life satisfaction of peoples during the COVID-19 home confinement: The ECLB-COVID19 multicenter study. medRxiv. 2020. doi:10.1101/2020.05.05.20091066
- 8 Ahmad AR, Murad HR. The impact of social media on panic during the COVID-19 pandemic in iraqi kurdistan: Online questionnaire study. *J Med Internet Res* 2020;**22**:1–11. doi:10.2196/19556
- 9 Alatrany SSJ. COVID-19 Related Stigma, Examining the View of the General Public of Stigma toward People with COVID-19 in Iraq. *Int J Psychosoc Rehabil* 2020;**24**:7108–15. doi:10.37200/ijpr/v24i5/pr2020720
- 10 Abdel Jalil MH, Alsous MM, Hammad EA, *et al.* Perceived public stress among jordanians during the covid-19 outbreak. *Disaster Med Public Health Prep* 2020;:1–16. doi:10.1017/dmp.2020.328
- 11 Al-Tammemi AB, Akour A, Alfalah L. Is It Just About Physical Health? An Online Cross-Sectional Study Exploring the Psychological Distress Among University Students in Jordan in the Midst of COVID-19 Pandemic. *Front Psychol* 2020;**11**:1–11. doi:10.3389/fpsyg.2020.562213
- 12 Sallam M, Dababseh D, Yaseen A, *et al.* COVID-19 misinformation: Mere harmless delusions or much more? A knowledge and attitude cross-sectional study among the general public residing in Jordan. medRxiv. 2020.

doi:10.1101/2020.07.13.20152694

- 13 Alsaqri SH, Alkwiese MJ, Aldalaykeh MK, *et al.* Anxiety among the general population during Coronavirus-19 disease in Saudi Arabia: Implications for a mental support program. medRxiv. 2020. doi:10.1101/2020.05.07.20090225
- 14 Alasousi L, al Hammouri S, Al-abdulahdi S *al.* Anxiety and media exposure during COVID-19 outbreak in Kuwait. medRxiv. 2020;:2020.08.24.20180745. doi:10.1101/2020.08.24.20180745
- 15 Öcal A, Cvetković VM, Baytiyeh H, *et al.* Public reactions to the disaster COVID-19: a comparative study in Italy, Lebanon, Portugal, and Serbia. *Geomatics, Nat Hazards Risk* 2020;**11**:1864–85. doi:10.1080/19475705.2020.1811405
- 16 Sfindla A, Hadrya F. Factors Associated with Psychological Distress and Physical Activity during the COVID-19 Pandemic. *Heal Secur* 2020;**18**:444–53. doi:10.1089/hs.2020.0062
- 17 Azizi A, Achak D, Aboudi K, *et al.* Health-related quality of life and behavior-related lifestyle changes due to the COVID-19 home confinement: Dataset from a Moroccan sample. *Data Br* 2020;**32**. doi:10.1016/j.dib.2020.106239
- 18 Sameer AS, Khan MA, Nissar S, *et al.* Assessment of Mental Health and Various Coping Strategies among general population living Under Imposed COVID-Lockdown Across world: A Cross-Sectional Study. *Ethics, Med Public Heal* 2020;**15**:100571. doi:10.1016/j.jemep.2020.100571
- 19 Al-Musharaf S. Prevalence and predictors of emotional eating among healthy young Saudi women during the COVID-19 pandemic. *Nutrients* 2020;**12**:1–17. doi:10.3390/nu12102923
- 20 Al-Qahtani AM, Elgzar WT, Ibrahim HAF. COVID-19 Pandemic: Psycho-social consequences during the social distancing period among Najran city population. *Psychiatr Danub* 2020;**32**:280–6. doi:10.24869/PSYD.2020.280
- 21 AlAteeq DA, Aljhani S, AlEesa D. Perceived stress among students in virtual classrooms during the COVID-19 outbreak in KSA. *J Taibah Univ Med Sci* 2020;**15**:398–403. doi:10.1016/j.jtumed.2020.07.004
- 22 Alkhamees AA, Alrashed SA, Alzunaydi AA, *et al.* The psychological impact of COVID-19 pandemic on the general population of Saudi Arabia. *Compr Psychiatry* 2020;**102**:4682–8. doi:10.1016/j.comppsy.2020.152192
- 23 Joseph R, Alshayban D, Lucca JM, *et al.* The immediate psychological response of the general population in Saudi Arabia during COVID-19 pandemic: A cross-sectional study. *J Infect Public Health* 2020;**14**:1–8. doi:10.1101/2020.06.19.20135533
- 24 Alyami M, Henning M, Krägeloh CU, *et al.* Psychometric Evaluation of the Arabic Version of the Fear of COVID-19 Scale. *Int J Ment Health Addict* 2020;:1–14. doi:10.1007/s11469-020-00316-x



- 25 Mohamed-Azzam Zakout Y, Saud Alreshidi F, Mustafa Elsaid R, *et al.* The magnitude of COVID-19 related stress, anxiety and depression associated with intense mass media coverage in Saudi Arabi. *AIMS Public Heal* 2020;7:664–78. doi:10.3934/publichealth.2020052
- 26 Drissi N, Alhmoudi A, Nuaimi H Al, *et al.* Investigating the impact of COVID-19 lockdown on the psychological health of university students and their attitudes toward mobile mental health solutions: Two-part questionnaire study. *JMIR Form Res* 2020;4. doi:10.2196/19876
- 27 Metwally AM, El-Sonbaty MM, Abdel-Latif GA, *et al.* Common phobias among Egyptian primary schoolchildren: An emergency trigger for panic disorder due to corona pandemic. *Open Access Maced J Med Sci* 2020;8:3–11. doi:10.3889/oamjms.2020.4766
- 28 Sallam M, Dababseh D, Yaseen A, *et al.* Conspiracy beliefs are associated with lower knowledge and higher anxiety levels regarding COVID-19 among students at the University of Jordan. *Int J Environ Res Public Health* Published Online First: 2020. doi:10.1101/2020.04.21.20064147
- 29 Alnasrallah M, Alshehab I. Geographic Disparities in Stress Levels during the COVID-19 Pandemic in Kuwait. *Pap Appl Geogr* 2020;6:449–59. doi:10.1080/23754931.2020.1807396
- 30 Saddik B, Hussein A, Albanna A, *et al.* Assessing the influence of parental anxiety on childhood anxiety during the COVID-19 pandemic in the United Arab Emirates. *medRxiv* Published Online First: 2020. doi:10.1101/2020.06.11.20128371
- 31 Saddik B, Hussein A, Sharif-Askari FS, *et al.* Increased levels of anxiety among medical and non-medical university students during the COVID-19 pandemic in the United Arab Emirates. *Risk Manag. Healthc. Policy.* 2020; **Volume 13**:2395–406. doi:10.1101/2020.05.10.20096933
- 32 Slimani M, Paravlic A, Mbarek F, *et al.* The Relationship Between Physical Activity and Quality of Life During the Confinement Induced by COVID-19 Outbreak: A Pilot Study in Tunisia. *Front Psychol* 2020;11. doi:10.3389/fpsyg.2020.01882
- 33 Thomas J, Barbato M. Positive religious coping and mental health among christians and muslims in response to the covid-19 pandemic. *Religions* 2020;11:1–13. doi:10.3390/rel11100498
- 34 Elkholy H, Tawfik F, Ibrahim I, *et al.* Mental health of frontline healthcare workers exposed to COVID-19 in Egypt: A call for action. *Int J Soc Psychiatry* 2020;:20764020960192–20764020960192. doi:10.1177/0020764020960192
- 35 Arafa A, Mohammed Z, Mahmoud O, *et al.* Depressed, anxious, and stressed: What have healthcare workers on the frontlines in Egypt and Saudi Arabia experienced during the COVID-19 pandemic? *J Affect Disord* 2021;278:365–71.

doi:10.1016/j.jad.2020.09.080

- 36 Hendy A, Abozeid A, Sallam G, *et al.* Predictive factors affecting stress among nurses providing care at COVID-19 isolation hospitals at Egypt. *Nurs Open* 2021;**8**:498–505. doi:10.1002/nop2.652
- 37 Abdulah DM, Mohammed AA. The consequences of the COVID-19 pandemic on perceived stress in clinical practice: experience of doctors in Iraqi Kurdistan. *Rom J Intern Med* 2020;**58**:219–27. doi:10.2478/rjim-2020-0020
- 38 Suleiman A, Bsisu I, Guzu H, *et al.* Preparedness of frontline doctors in Jordan healthcare facilities to COVID-19 outbreak. *Int J Environ Res Public Health* 2020;**17**. doi:10.3390/ijerph17093181
- 39 Hamdan Mansour A, Al Shibi AN, Khalifeh AH, *et al.* Health-care workers' knowledge and management skills of psychosocial and mental health needs and priorities of individuals with COVID-19. *Ment Heal Soc Incl* 2020;**24**:135–44. doi:10.1108/MHSI-04-2020-0022
- 40 Maraqa B, Nazzal Z, Zink T. Palestinian Health Care Workers' Stress and Stressors During COVID-19 Pandemic: A Cross-Sectional Study. *J Prim Care Community Heal* 2020;**11**:2150132720955026–2150132720955026. doi:10.1177/2150132720955026
- 41 Ali H, Ismail AA, Abdalwahab A. Mental stress in anesthesia and intensive care physicians during COVID-19 outbreak. *Anesthesiol Pain Med* 2020;**10**:1–6. doi:10.5812/aapm.106623
- 42 Aly MM, Elchaghaby MA. Impact of novel coronavirus disease (COVID-19) on Egyptian dentists' fear and dental practice (a cross-sectional survey). *BDJ Open* 2020;**6**. doi:10.1038/s41405-020-00047-0
- 43 AlAteeq DA, Aljhani S, Althiyabi I, *et al.* Mental health among healthcare providers during coronavirus disease (COVID-19) outbreak in Saudi Arabia. *J Infect Public Health* 2020;**13**:1432–7. doi:10.1016/j.jiph.2020.08.013
- 44 Alrubaiee GG, Al-Qalah TAH, Al-Aawar MSA. Knowledge, attitudes, anxiety, and preventive behaviours towards COVID-19 among health care providers in Yemen: an online cross-sectional survey. *BMC Public Health* 2020;**20**:1–11. doi:10.1186/s12889-020-09644-y
- 45 Naser AY, Dahmash EZ, Al-Rousan R, *et al.* Mental health status of the general population, healthcare professionals, and university students during 2019 coronavirus disease outbreak in Jordan: A cross-sectional study. *Brain Behav* 2020;**10**:1–13. doi:10.1002/brb3.1730
- 46 Fawaz M, Samaha A. COVID-19 quarantine: Post-traumatic stress symptomatology among Lebanese citizens. *Int J Soc Psychiatry* 2020;**66**:666–74. doi:10.1177/0020764020932207

- 47 Jahrami H, BaHammam AS, AlGahtani H, *et al.* The examination of sleep quality for frontline healthcare workers during the outbreak of COVID-19. *Sleep Breath* 2021;**25**:503–11. doi:10.1007/s11325-020-02135-9
- 48 Hawari FI, Obeidat NA, Dodin YI, *et al.* The inevitability of Covid-19 related distress among healthcare workers: Findings from a low caseload country under lockdown. *medRxiv* Published Online First: 2020. doi:10.1101/2020.06.14.20130724
- 49 Alenazi TH, BinDhim NF, Alenazi MH, *et al.* Prevalence and predictors of anxiety among healthcare workers in Saudi Arabia during the COVID-19 pandemic. *J Infect Public Health* 2020;**13**:1645–51. doi:10.1016/j.jiph.2020.09.001
- 50 Elhadi M, Msherghi A, Elgzairi M, *et al.* Psychological status of healthcare workers during the civil war and COVID-19 pandemic: A cross-sectional study. *J Psychosom Res* 2020;**137**:110221. doi:10.1016/j.jpsychores.2020.110221
- 51 Alshekaili M, Hassan W, Al Said N, *et al.* Factors associated with mental health outcomes across healthcare settings in Oman during COVID-19: Frontline versus non-frontline healthcare workers. *BMJ Open* 2020;**10**:1–7. doi:10.1136/bmjopen-2020-042030
- 52 Badahdah A, Khamis F, Al Mahyijari N, *et al.* The mental health of health care workers in Oman during the COVID-19 pandemic. *Int J Soc Psychiatry* Published Online First: 2020. doi:10.1177/0020764020939596
- 53 Abolfotouh MA, Almutairi AF, Banimustafa AA, *et al.* Perception and attitude of healthcare workers in Saudi Arabia with regard to Covid-19 pandemic and potential associated predictors. *BMC Infect Dis* 2020;**20**:719. doi:10.1186/s12879-020-05443-3
- 54 Al Sulais E, Mosli M, Alameel T. The psychological impact of COVID-19 pandemic on physicians in Saudi Arabia: A cross-sectional study. *Saudi J Gastroenterol* 2020;**26**:249–55. doi:10.4103/sjg.SJG\_174\_20
- 55 Temsah MH, Alhuzaimi AN, Alamro N, *et al.* Knowledge, Attitudes, and Practices of Healthcare Workers during the Early COVID-19 Pandemic in a Main, Academic Tertiary Care Centre in Saudi Arabia. *Epidemiol Infect* 2020;**148**:e203–e203. doi:10.1017/S0950268820001958
- 56 Temsah M-H, Al-Sohime F, Alamro N, *et al.* The psychological impact of COVID-19 pandemic on health care workers in a MERS-CoV endemic country. *J Infect Public Health* 2020;**13**:877–82. doi:10.1016/j.jiph.2020.05.021
- 57 Halayem S, Sayari N, Cherif W, *et al.* How Tunisian physicians of public health hospitals deal with COVID-19 pandemic: Perceived stress and coping strategies. *Psychiatry Clin Neurosci* 2020;**74**:496–7. doi:10.1111/pcn.13097
- 58 Al-Hanawi MK, Mwale ML, Alshareef N, *et al.* Psychological distress amongst health workers and the general public during the COVID-19 pandemic in Saudi Arabia. *Risk Manag Healthc Policy* 2020;**13**:733–42. doi:10.2147/RMHP.S264037

- 59 Janati Idrissi A, Lamkaddem A, Benouajjit A, *et al.* Sleep quality and mental health in the context of COVID-19 pandemic and lockdown in Morocco. *Sleep Med* 2020;**74**:248–53. doi:10.1016/j.sleep.2020.07.045
- 60 Ahmed ZM, Khalil MF, Kohail AM, *et al.* The Prevalence and Predictors of Post-Stroke Depression and Anxiety During COVID-19 Pandemic. *J Stroke Cerebrovasc Dis* 2020;**29**:105315. doi:10.1016/j.jstrokecerebrovasdis.2020.105315
- 61 Said RM, El-Shafei DA. Occupational stress, job satisfaction, and intent to leave: nurses working on front lines during COVID-19 pandemic in Zagazig City, Egypt. *Environ Sci Pollut Res* 2020;**19**. doi:10.1007/s11356-020-11235-8
- 62 Al Issa H-E, Jaleel EM. Social isolation and psychological wellbeing: lessons from Covid-19. *Manag Sci Lett* 2021;**11**:609–18. doi:10.5267/j.msl.2020.9.006
- 63 Haider AS, Al-Salman S. Dataset of Jordanian university students' psychological health impacted by using e-learning tools during COVID-19. *Data Br* 2020;**32**:106104. doi:10.1016/j.dib.2020.106104
- 64 Shahrouf G, Dardas LA. Acute stress disorder, coping self-efficacy and subsequent psychological distress among nurses amid COVID-19. *J Nurs Manag* 2020;**28**:1686–95. doi:10.1111/jonm.13124
- 65 Olaimat AN, Aolymat I, Elshahoryi N, *et al.* Attitudes, Anxiety, and Behavioral Practices Regarding COVID-19 among University Students in Jordan: A Cross-Sectional Study. *Am J Trop Med Hyg* 2020;**103**:1177–83. doi:10.4269/ajtmh.20-0418
- 66 Al-Hashel JY, Ismail II. Impact of coronavirus disease 2019 (COVID-19) pandemic on patients with migraine: a web-based survey study. *J Headache Pain* 2020;**21**:115. doi:10.1186/s10194-020-01183-6
- 67 Burhamah W, AlKhayyat A, Oroszlányová M, *et al.* The psychological burden of the COVID-19 pandemic and associated lockdown measures: Experience from 4000 participants. *J Affect Disord* 2020;**277**:977–85. doi:10.1016/j.jad.2020.09.014
- 68 Rahali K, Abidli Z, Khohmimidi A, *et al.* Ibn tofail's university students' satisfaction evaluation towards distance learning and its impacts on the students' mental health during the covid 19 confinement. *Bangladesh J Med Sci* 2020;**19**:S 51-S 57. doi:10.3329/bjms.v19i0.48166
- 69 Farrell T, Reagu S, Mohan S, *et al.* The impact of the COVID-19 pandemic on the perinatal mental health of women. *J Perinat Med* 2020;**48**:971–6. doi:10.1515/jpm-2020-0415
- 70 Sediri S, Zgueb Y, Ouanes S, *et al.* Women's mental health: acute impact of COVID-19 pandemic on domestic violence. *Arch Womens Ment Health* 2020;**23**:749–56. doi:10.1007/s00737-020-01082-4
- 71 Ahmed MA, Jouhar R, Ahmed N, *et al.* Fear and practice modifications among dentists to combat novel coronavirus disease

- (COVID-19) outbreak. *Int J Environ Res Public Health* 2020;**17**. doi:10.3390/ijerph17082821
- 72 Alkhotani A, Siddiqui MI, Almunashri F, *et al*. The effect of COVID-19 pandemic on seizure control and self-reported stress on patient with epilepsy. *Epilepsy Behav* 2020;**112**:107323. doi:10.1016/j.yebeh.2020.107323
- 73 Almater A, Tobaigy M, Younis A, *et al*. Effect of 2019 coronavirus pandemic on ophthalmologists practicing in Saudi Arabia: A psychological health assessment. *Middle East Afr J Ophthalmol* 2020;**27**:79–85. doi:10.4103/meajo.MEAJO\_220\_20
- 74 Tayyib NA, Alsolami FJ. Measuring the extent of stress and fear among Registered Nurses in KSA during the COVID-19 Outbreak. *J Taibah Univ Med Sci* 2020;**15**:410–6. doi:10.1016/j.jtumed.2020.07.012
- 75 Mosli M, Alourfi M, Alamoudi A, *et al*. A cross-sectional survey on the psychological impact of the COVID-19 pandemic on inflammatory bowel disease patients in Saudi Arabia. *Saudi J Gastroenterol* 2020;**26**:263–71. doi:10.4103/sjg.SJG\_220\_20
- 76 Hamad SA, Abdallah YN, Eman Zmaily D, *et al*. Depression and anxiety during 2019 coronavirus disease pandemic in Saudi Arabia: a cross-sectional study. doi:10.1101/2020.05.09.20096677
- 77 Fekih-Romdhane F, Ghrissi F, Abbassi B, *et al*. Prevalence and predictors of PTSD during the COVID-19 pandemic: Findings from a Tunisian community sample. *Psychiatry Res* 2020;**290**:113131. doi:10.1016/j.psychres.2020.113131
- 78 Fekih-Romdhane F, Snene H, Jebri A, *et al*. Psychological impact of the Pandemic COVID-19 Outbreak Among Medical Residents in Tunisia. *Asian J Psychiatr* 2020;**53**:102349. doi:10.1016/j.ajp.2020.102349
- 79 Vally Z. Public perceptions, anxiety and the perceived efficacy of health-protective behaviours to mitigate the spread of the SARS-Cov-2/ COVID-19 pandemic. *Public Health* 2020;**187**:67–73. doi:10.1016/j.puhe.2020.08.002
- 80 Madani A, Boutebal SE, Bryant CR. The psychological impact of confinement linked to the coronavirus epidemic COVID-19 in Algeria. *Int J Environ Res Public Health* 2020;**17**. doi:10.3390/ijerph17103604
- 81 El Keshky MES, Alsabban AM, Basyouni SS. The psychological and social impacts on personal stress for residents quarantined for COVID-19 in Saudi Arabia. *Arch Psychiatr Nurs* 2021;**35**:311–6. doi:10.1016/j.apnu.2020.09.008
- 82 Blbas HTA, Aziz KF, Nejad SH, *et al*. Phenomenon of depression and anxiety related to precautions for prevention among population during the outbreak of COVID-19 in Kurdistan Region of Iraq: based on questionnaire survey. *J Public Heal* 2020;:1–5. doi:10.1007/s10389-020-01325-9
- 83 Alkeridy WA, Almaghlouth I, Alrashed R, *et al*. A Unique Presentation of Delirium in a Patient with Otherwise Asymptomatic COVID-19. *J Am Geriatr Soc* 2020;**68**:1382–4. doi:10.1111/jgs.16536

- 84 Abdelhafiz AS, Alorabi M. Social Stigma: The Hidden Threat of COVID-19. *Front Public Heal* Published Online First: 2020. <https://doi.org/10.3389/fpubh.2020.00429>
- 85 Seidi PAM, Ardebil MD, Jaff D. COVID-19 pandemic: New challenge to securing mental well-being in conflict settings. *Asian J Psychiatr* 2020;**51**:102151. doi:10.1016/j.ajp.2020.102151
- 86 Saniotis A, Mohammadi K. Comment on psychological interventions during COVID-19: Challenges for Iraqi Kurdistan. *Asian J Psychiatr* 2020;**54**:102284. doi:10.1016/j.ajp.2020.102284
- 87 Al Gharaibeh F. The response of Jordanian society and social workers to the COVID-19 crisis. *Int Soc Work* 2020;**63**:811–4. doi:10.1177/0020872820944989
- 88 Sakr CJ, Romani M. Wellbeing and stress management during the covid-19 pandemic. *Middle East J Anesthesiol* 2020;**27**:167–70. <https://search.bvsalud.org/global-literature-on-novel-coronavirus-2019-ncov/resource/en/covidwho-830869>
- 89 Banjar WM, Alaqeel MK. Healthcare worker’s mental health dilemma during COVID-19 pandemic: A reflection on the KSA experience. *J Taibah Univ Med Sci* 2020;**15**:255–7. doi:10.1016/j.jtumed.2020.06.006
- 90 Musa HH, Musa TH, Musa IH, *et al.* The silent psychological impact of the COVID-19 pandemic in Sudan. *Ethics, Med Public Heal* 2021;**16**:100604. doi:10.1016/j.jemep.2020.100604
- 91 Zgueb Y, Bourgou S, Neffeti A, *et al.* Psychological crisis intervention response to the COVID 19 pandemic: A Tunisian centralised Protocol. *Psychiatry Res* 2020;**289**:113042. doi:10.1016/j.psychres.2020.113042
- 92 Jaspal R, Assi M, Maatouk I. Potential impact of the COVID-19 pandemic on mental health outcomes in societies with economic and political instability: case of Lebanon. *Ment Heal Rev J* 2020;**25**:215–9. doi:10.1108/MHRJ-05-2020-0027
- 93 Khoury B, El-Khoury J, Ammar J. Psychological Needs and Response During the COVID-19 Pandemic in Lebanon. *Psychol Trauma Theory, Res Pract Policy* Published Online First: 2020. doi:10.1037/tra0000757
- 94 El-Khatib Z, Nsour M Al, Khader YS, *et al.* Mental health support in Jordan for the general population and for the refugees in the Zaatari camp during the period of COVID-19 lockdown. *Psychol Trauma Theory, Res Pract Policy* 2020;**12**:511–4. doi:10.1037/TRA0000813
- 95 Khoury R, Karam G. Impact of COVID-19 on mental healthcare of older adults: Insights from Lebanon (Middle East). *Int Psychogeriatrics* 2020;**32**:1177–80. doi:10.1017/S104161022000068X
- 96 Hammoudeh W, Jabr S, Helbich M, *et al.* On Mental Health Amid Covid-19. *J Palest Stud* 2020;**49**:77–90.

doi:10.1525/jps.2020.49.4.77

- 97 Hammoudeh W, Kienzler H, Meagher K, *et al.* Social and political determinants of health in the occupied Palestine territory (oPt) during the COVID-19 pandemic: Who is responsible? *BMJ Glob Heal* 2020;**5**. doi:10.1136/bmjgh-2020-003683
- 98 Al-Mahadin S. Laughing it off: Coronavirus superspreaders, anxiety, and fear in Jordan and Australia. *Psychol Trauma Theory, Res Pract Policy* 2020;**12**:S45–6. doi:10.1037/tra0000630
- 99 El Chammay R, Roberts B. Using COVID-19 responses to help strengthen the mental health system in Lebanon. *Psychol Trauma Theory, Res Pract Policy* 2020;**12**:S281–3. doi:10.1037/tra0000732
- 100 AlHumaid J, Ali S, Farooq I. The Psychological Effects of the COVID-19 Pandemic and Coping With Them in Saudi Arabia. *Psychol Trauma Theory, Res Pract Policy* 2020;**12**:505–7. doi:10.1037/tra0000623
- 101 Algunmeeyn A, El-Dahiyat F, Altakhineh MM, *et al.* Understanding the factors influencing healthcare providers' burnout during the outbreak of COVID-19 in Jordanian hospitals. *J Pharm Policy Pract* 2020;**13**. doi:10.1186/s40545-020-00262-y
- 102 Fawaz M, Samaha A. The psychosocial effects of being quarantined following exposure to COVID-19: A qualitative study of Lebanese health care workers. *Int J Soc Psychiatry* 2020;**66**:560–5. doi:10.1177/0020764020932202
