# Supplementary material for: Mental health research in the Arab region in response to the COVID-19 pandemic: a scoping review
Source: HighWire-hosted journal article supplement (doi:10.1136/gpsych-2021-100590), 2022-03-31
Supplement: gpsych-2021-100590supp002_data_supplement.pdf [file gpsych-2021-100590supp002_data_supplement.pdf]

## **Supplemental Material 2**

**Supplemental Table 2. Newcastle-Ottawa Scale (NOS) for case-control studies**

**Supplemental Table 3. NOS Scores of the included case-control studies**

**Supplemental Table 4. Modified NOS for cross-sectional studies**

**Supplemental Table 5. Modified NOS Scores of the included cross-sectional studies**

**Supplemental Table 2: Newcastle-Ottawa Scale (NOS) for case-control studies [1]**

**Selection:** (Maximum 4 stars) \*\*\*\*

1. Is the Case Definition adequate?
  - a) Yes, with independent validation. \* (Independent or blind assessment stated in the paper, or confirmation by reference to secure records (x-rays, medical records, etc.)
  - b) Yes, e.g., record linkage or based on self-reports.
  - c) No description.
  
2. Representativeness of the cases:
  - a) Consecutive or obviously representative series of cases. \* (All eligible cases with outcome of interest over a defined period of time, or all cases in a defined catchment area, or all cases in a defined hospital or clinic, group of hospitals, health maintenance organization, or an appropriate sample of those cases e.g., random sample)
  - b) Potential for selection biases or not stated.
  
3. Selection of Controls:

Whether the control series used in the study is derived from the same population as the cases and essentially would have been cases had the outcome been present.

  - a) Community controls. \* (same community as cases and would be cases if had outcome)
  - b) Hospital controls. (within same community as cases, i.e., not another city, but derived from a hospitalized population)
  - c) No description.

4. Definition of Controls:

- a) No history of disease (endpoint). \* (If cases are first occurrence of outcome, then it must explicitly state that controls have no history of this outcome. If cases have new (not necessarily first) occurrence of outcome, then controls with previous occurrences of outcome of interest should not be excluded)
- b) No description of source.

**Comparability:** (Maximum 2 stars) \*\*

1. Comparability of Cases and Controls on the basis of the design or analysis:

Either cases and controls must be matched in the design and/or confounders must be adjusted for in the analysis. Statements of no differences between groups or that differences were not statistically significant are not sufficient for establishing comparability.

- a) Study controls for the most important factor(s). \*
- b) Study controls for any additional factor. \*
- c) None of the above.

**Exposure:** (Maximum 3 stars) \*\*\*

1. Ascertainment of exposure:

- a) Secure record. \*
- b) Structured interview where blind to case/control status. \*
- c) Interviewer not blinded to case/control status.
- d) Written self-report or medical record only.
- e) No description.

2. Same method of ascertainment for Cases and Controls:

- a) Yes. \*
- b) No.

3. Non-response rate:

- a) Same rate for both groups. \*
- b) Non respondents described.
- c) Rate is different and no designation.

**Total quality scoring (Maximum 9 stars):\***

- a) High: 7-9
- b) Moderate: 5-6
- c) Low: 0-4

---

\* This scoring system is based on previous reviews [2, 3].

**Supplemental Table 3: NOS Scores of the included case-control studies (n = 1)**

| Study                               | Selection                   |                                 |                       |                        |                 | Comparability                       |                     | Exposure                  |                                                     |                   |                | Total Stars | Total Quality |
|-------------------------------------|-----------------------------|---------------------------------|-----------------------|------------------------|-----------------|-------------------------------------|---------------------|---------------------------|-----------------------------------------------------|-------------------|----------------|-------------|---------------|
|                                     | Adequacy of case definition | Representativeness of the cases | Selection of controls | Definition of controls | Selection Score | Comparability of cases and controls | Comparability Score | Ascertainment of Exposure | Same method of ascertainment for cases and controls | Non-response rate | Exposure Score |             |               |
| Shalash et al., 2020 <sup>[4]</sup> | -                           | -                               | *                     | *                      | 2               | *                                   | 1                   | -                         | *                                                   | -                 | 1              | 4           | Low           |

**Supplemental Table 4: Modified NOS for cross-sectional studies [5]**

Quality Score: (Low:  $\leq 4$ ; Moderate: 5-6; High:  $\geq 7$ )

**Selection:** (Maximum 5 stars) \*\*\*\*\*

1. Representativeness of the sample:
  - a) Truly representative of the average in the target population. \* (All subjects of the target population were successfully enrolled, or random sampling)
  - b) Somewhat representative of the average in the target population. \* (Non-random sampling e.g., snow-ball sampling, purposive sample etc.)
  - c) Selected group of users or convenience sample.
  - d) No description of the sampling strategy.
2. Sample size:
  - a) Justified and satisfactory. \* (Calculated and met, or if the whole target population was included)
  - b) Not justified, or no information provided.
3. Non-respondents:
  - a) Comparability between respondents and non-respondents characteristics is established, or basic summary of non-respondent characteristics in sampling frame recorded, and the response rate is satisfactory. (>60%) \*
  - b) Comparability between respondents and non-respondents is unsatisfactory, or no summary data on non-respondents, or the response rate is unsatisfactory.
  - c) No description of the response rate or the characteristics of the responders and the non-respondents.
4. Ascertainment of the exposure (risk factor):
  - a) Validated measurement tool. \*\*
  - b) Non-validated measurement tool, but the tool is available or described. \*
  - c) No description of the measurement tool.
  - d) Not applicable. (Purely descriptive study not evaluating the effects of any risk factors)

**Comparability:** (Maximum 2 stars) \*\*

1. The subjects in different outcome groups are comparable, based on the study design or analysis. Confounding factors are controlled.
  - a) The study controls for the most important factors. \* (Data/ results adjusted for relevant predictors/risk factors/confounders e.g., age, sex, etc.)
  - b) The study control for any additional factor. \*
  - c) Data/results not adjusted for the most important factors, or information not provided.

**Outcome:** (Maximum 3 stars) \*\*\*

1. Assessment of the outcome:
  - a) Independent blind assessment. \*\*
  - b) Record linkage or Clinical record. \*\* (e.g., identified through ICD codes on database records)
  - c) Self-report \*
  - d) No description
2. Statistical test:
  - a) Statistical tests used to analyze the data are clearly described, appropriate and the measures of association are presented. \* (Including OR, CI and P value, or Beta coefficient, SE and P value)
  - b) Statistical tests are not appropriate, not described or incomplete.

**Total quality scoring** (Maximum 10 stars):

- d) High: 7-10
- e) Moderate: 5-6
- f) Low: 0-4

**Supplemental Table 5: Modified NOS scores of the included cross-sectional studies (n = 81)**

| Study                                            | Selection                        |             |                 |                           |                 | Comparability                                              |                     | Outcome                   |                   |               | Total Stars | Total Quality |
|--------------------------------------------------|----------------------------------|-------------|-----------------|---------------------------|-----------------|------------------------------------------------------------|---------------------|---------------------------|-------------------|---------------|-------------|---------------|
|                                                  | Representativeness of the sample | Sample Size | Non-Respondents | Ascertainment of Exposure | Selection Score | Comparability between subjects in different outcome groups | Comparability Score | Assessment of the outcome | Statistical Tests | Outcome Score |             |               |
| Abdel Jalil et al., 2020 <sup>[6]</sup>          | *                                | *           | -               | *                         | 3               | **                                                         | 2                   | *                         | *                 | 2             | 7           | High          |
| Abdulah et al., 2020 <sup>[7]</sup>              | *                                | *           | *               | *                         | 4               | -                                                          | 0                   | *                         | *                 | 2             | 6           | Moderate      |
| Abolfotouh et al., 2020 <sup>[8]</sup>           | *                                | *           | *               | *                         | 4               | **                                                         | 2                   | *                         | *                 | 2             | 8           | High          |
| Ahmad et al., 2020 <sup>[9]</sup>                | -                                | -           | -               | *                         | 1               | -                                                          | 0                   | *                         | *                 | 2             | 3           | Low           |
| Al Issa et al., 2021 <sup>[10]</sup>             | *                                | *           | -               | **                        | 4               | *                                                          | 1                   | *                         | *                 | 2             | 7           | High          |
| Al Omari et al., 2020 <sup>[11]</sup>            | -                                | *           | -               | *                         | 2               | *                                                          | 1                   | *                         | *                 | 2             | 5           | Moderate      |
| Al Sulais et al., 2020 <sup>[12]</sup>           | *                                | -           | -               | *                         | 2               | **                                                         | 2                   | *                         | *                 | 2             | 6           | Moderate      |
| Alasousi et al., 2020 <sup>[13]</sup>            | *                                | -           | -               | *                         | 2               | **                                                         | 2                   | *                         | *                 | 2             | 6           | Moderate      |
| AlAteeq, Aljhani, & AlEesa, 2020 <sup>[14]</sup> | *                                | -           | -               | *                         | 2               | -                                                          | 0                   | *                         | *                 | 2             | 4           | Low           |



|                                                           |   |   |   |    |   |    |   |   |   |   |   |          |
|-----------------------------------------------------------|---|---|---|----|---|----|---|---|---|---|---|----------|
| AlAteeq, Aljhani, Althiyabi, et al., 2020 <sup>[15]</sup> | * | * | - | ** | 4 | ** | 2 | * | * | 2 | 8 | High     |
| Alatrany, 2020 <sup>[16]</sup>                            | - | - | - | *  | 1 | -  | 0 | * | - | 1 | 2 | Low      |
| Alenazi et al., 2020 <sup>[17]</sup>                      | * | * | - | *  | 3 | ** | 2 | * | * | 2 | 7 | High     |
| Al-Hanawi et al., 2020 <sup>[18]</sup>                    | - | - | - | *  | 1 | *  | 1 | * | * | 2 | 4 | Low      |
| Al-Hashel et al., 2020 <sup>[19]</sup>                    | * | - | - | *  | 2 | ** | 2 | * | * | 2 | 6 | Moderate |
| Ali et al., 2020 <sup>[20]</sup>                          | * | * | - | *  | 3 | -  | 0 | * | * | 2 | 5 | Moderate |
| Alkhamees et al., 2020 <sup>[21]</sup>                    | * | * | - | *  | 3 | -  | 0 | * | * | 2 | 5 | Moderate |
| Alkhotani et al., 2020 <sup>[22]</sup>                    | * | - | * | *  | 3 | -  | 0 | * | * | 2 | 5 | Moderate |
| Almater et al., 2020 <sup>[23]</sup>                      | * | - | - | *  | 2 | -  | 0 | * | * | 2 | 4 | Low      |
| Al-Musharaf, 2020 <sup>[24]</sup>                         | * | * | - | ** | 4 | ** | 2 | * | * | 2 | 8 | High     |
| Alnasrallah et al., 2020 <sup>[25]</sup>                  | - | - | - | *  | 1 | -  | 0 | * | * | 2 | 3 | Low      |
| Al-Qahtani et al., 2020 <sup>[26]</sup>                   | * | * | - | ** | 4 | -  | 0 | * | * | 2 | 6 | Moderate |

|                                         |   |   |   |    |   |    |   |   |   |   |   |          |
|-----------------------------------------|---|---|---|----|---|----|---|---|---|---|---|----------|
| Alrubaiee et al., 2020 <sup>[27]</sup>  | * | - | - | *  | 2 | -  | 0 | * | * | 2 | 4 | Low      |
| Alsaqri et al., 2020 <sup>[28]</sup>    | * | * | - | ** | 2 | -  | 0 | * | * | 2 | 4 | Low      |
| Alshekaili et al., 2020 <sup>[29]</sup> | * | * | - | *  | 3 | ** | 2 | * | * | 2 | 7 | High     |
| Al-Tammemi et al., 2020 <sup>[30]</sup> | * | - | - | *  | 2 | ** | 2 | * | * | 2 | 6 | Moderate |
| Aly et al., 2020 <sup>[31]</sup>        | * | * | - | -  | 2 | -  | 0 | * | - | 1 | 3 | Low      |
| Ammar et al., 2020 <sup>[32]</sup>      | - | - | - | *  | 1 | -  | 0 | * | * | 2 | 3 | Low      |
| Arafa et al., 2020 <sup>[33]</sup>      | * | * | - | *  | 3 | ** | 2 | * | * | 2 | 7 | High     |
| Arafa et al., 2021 <sup>[34]</sup>      | * | - | - | *  | 2 | ** | 2 | * | * | 2 | 6 | Moderate |
| Azizi et al., 2020 <sup>[35]</sup>      | - | - | - | *  | 1 | -  | 0 | * | * | 2 | 3 | Low      |
| Badahdah et al., 2020 <sup>[36]</sup>   | * | - | - | *  | 1 | -  | 0 | * | - | 1 | 2 | Low      |
| Bibas et al., 2020 <sup>[37]</sup>      | - | - | - | *  | 1 | -  | 0 | * | * | 2 | 3 | Low      |
| Burhamah et al., 2020 <sup>[38]</sup>   | - | * | - | *  | 2 | ** | 2 | * | * | 2 | 6 | Moderate |
| Drissi et al., 2020 <sup>[39]</sup>     | * | - | - | *  | 2 | -  | 0 | * | - | 1 | 3 | Low      |
| El Keshky et al., 2020 <sup>[40]</sup>  | * | - | - | ** | 3 | ** | 2 | * | * | 2 | 7 | High     |

|                                                       |   |   |   |    |   |    |   |    |   |   |   |          |
|-------------------------------------------------------|---|---|---|----|---|----|---|----|---|---|---|----------|
| Elhadi et al., 2020 <sup>[41]</sup>                   | * | - | - | *  | 2 | -  | 0 | *  | * | 2 | 4 | Low      |
| Elkholy et al., 2020 <sup>[42]</sup>                  | * | * | - | *  | 3 | ** | 2 | *  | * | 2 | 7 | High     |
| El-Zoghby et al., 2020 <sup>[43]</sup>                | * | - | - | *  | 2 | ** | 2 | *  | * | 2 | 6 | Moderate |
| Farrell et al., 2020 <sup>[44]</sup>                  | * | * | - | *  | 3 | -  | 0 | *  | * | 2 | 5 | Moderate |
| Fawaz et al., 2020 <sup>[45]</sup>                    | * | - | * | *  | 3 | ** | 2 | *  | * | 2 | 7 | High     |
| Fekih-Romdhane, Ghrissi, et al., 2020 <sup>[46]</sup> | * | - | - | ** | 3 | ** | 2 | *  | * | 2 | 7 | High     |
| Fekih-Romdhane, Snene, et al., 2020 <sup>[47]</sup>   | - | - | - | ** | 2 | ** | 2 | *  | * | 2 | 6 | Moderate |
| H. S. Alyami et al., 2020 <sup>[48]</sup>             | - | * | - | *  | 2 | *  | 1 | *  | * | 2 | 5 | Moderate |
| Haider et al., 2020 <sup>[49]</sup>                   | - | - | - | -  | 0 | -  | 0 | *  | - | 1 | 1 | Low      |
| Halayem et al., 2020 <sup>[50]</sup>                  | - | - | - | ** | 2 | -  | 0 | *  | * | 2 | 4 | Low      |
| Hamdan Mansour et al., 2020 <sup>[51]</sup>           | * | - | - | *  | 2 | -  | 0 | *  | * | 2 | 4 | Low      |
| Hawari et al., 2020 <sup>[52]</sup>                   | * | - | - | *  | 2 | ** | 2 | *  | * | 2 | 6 | Moderate |
| Hendy et al., 2021 <sup>[53]</sup>                    | * | - | * | *  | 3 | ** | 2 | *  | * | 2 | 7 | High     |
| Iqbal et al., 2020 <sup>[54]</sup>                    | * | - | - | *  | 2 | -  | 0 | ** | * | 3 | 5 | Moderate |

|                                                   |   |   |   |    |   |    |   |   |   |   |   |          |
|---------------------------------------------------|---|---|---|----|---|----|---|---|---|---|---|----------|
| Jahrami et al., 2020 <sup>[55]</sup>              | * | - | * | ** | 4 | ** | 2 | * | * | 2 | 8 | High     |
| Janati Idrissi et al., 2020 <sup>[56]</sup>       | - | - | - | ** | 2 | *  | 1 | * | * | 2 | 5 | Moderate |
| Joseph et al., 2020 <sup>[57]</sup>               | - | - | - | *  | 1 | ** | 2 | * | * | 2 | 5 | Moderate |
| M. A. Ahmed et al., 2020 <sup>[58]</sup>          | * | - | - | -  | 1 | -  | 0 | * | - | 1 | 2 | Low      |
| M. Alyami et al., 2020 <sup>[59]</sup>            | * | - | - | ** | 3 | -  | 0 | * | * | 2 | 5 | Moderate |
| M. H. Temsah et al., 2020 <sup>[60]</sup>         | * | - | * | *  | 3 | ** | 2 | * | * | 2 | 7 | High     |
| M.-H. Temsah et al., 2020 <sup>[61]</sup>         | * | - | * | *  | 3 | ** | 2 | * | - | 1 | 6 | Moderate |
| Madani et al., 2020 <sup>[62]</sup>               | * | - | - | *  | 2 | *  | 1 | * | * | 2 | 5 | Moderate |
| Maraqa et al., 2020 <sup>[63]</sup>               | * | * | - | *  | 3 | -  | 0 | * | * | 2 | 5 | Moderate |
| Metwally et al., 2020 <sup>[64]</sup>             | * | * | * | *  | 4 | *  | 1 | * | * | 2 | 7 | High     |
| Mohamed-Azzam Zakout et al., 2020 <sup>[65]</sup> | - | - | - | *  | 1 | -  | 0 | * | * | 2 | 3 | Low      |
| Mosli et al., 2020 <sup>[66]</sup>                | * | - | - | *  | 2 | ** | 2 | * | * | 2 | 6 | Moderate |
| Naser et al., 2020 <sup>[67]</sup>                | - | * | - | *  | 2 | ** | 2 | * | * | 2 | 6 | Moderate |
| Öcal et al., 2020 <sup>[68]</sup>                 | * | - | - | *  | 2 | ** | 2 | * | * | 2 | 6 | Moderate |

|                                                                            |   |   |   |    |   |    |   |    |   |   |   |          |
|----------------------------------------------------------------------------|---|---|---|----|---|----|---|----|---|---|---|----------|
| Olaimat et al., 2020 <sup>[69]</sup>                                       | * | * | - | *  | 3 | -  | 0 | *  | * | 2 | 5 | Moderate |
| Rahali et al., 2020 <sup>[70]</sup>                                        | * | - | - | ** | 3 | -  | 0 | *  | * | 2 | 5 | Moderate |
| Saddik, Hussein, Albanna, et al., 2020 <sup>[71]</sup>                     | * | * | - | ** | 4 | ** | 2 | *  | * | 2 | 8 | High     |
| Saddik, Hussein, Sharif-Askari, et al., 2020 <sup>[72]</sup>               | * | * | - | *  | 3 | *  | 1 | *  | * | 2 | 6 | Moderate |
| Said et al., 2020 <sup>[73]</sup>                                          | * | * | - | *  | 3 | ** | 2 | *  | * | 2 | 7 | High     |
| Sallam, Dababseh, Yaseen, Al-Haidar, Ababneh, et al., 2020 <sup>[74]</sup> | * | - | - | *  | 2 | -  | 0 | *  | * | 2 | 4 | Low      |
| Sallam, Dababseh, Yaseen, Al-Haidar, Taim, et al., 2020 <sup>[75]</sup>    | * | - | - | *  | 2 | -  | 0 | *  | * | 2 | 4 | Low      |
| Sameer et al., 2020 <sup>[76]</sup>                                        | * | - | - | *  | 2 | -  | 0 | *  | * | 2 | 4 | Low      |
| Samrah et al., 2020 <sup>[77]</sup>                                        | * | * | * | ** | 5 | -  | 0 | ** | - | 2 | 7 | High     |
| Sediri et al., 2020 <sup>[78]</sup>                                        | * | - | - | ** | 3 | -  | 0 | *  | * | 2 | 5 | Moderate |
| Sfendla et al., 2020 <sup>[79]</sup>                                       | * | - | - | ** | 3 | ** | 2 | *  | * | 2 | 7 | High     |

|                                          |   |   |   |    |   |    |   |    |   |   |    |          |
|------------------------------------------|---|---|---|----|---|----|---|----|---|---|----|----------|
| Shahrour et al., 2020 <sup>[80]</sup>    | * | * | - | ** | 4 | ** | 2 | *  | * | 2 | 8  | High     |
| Slimani et al., 2020 <sup>[81]</sup>     | * | - | * | ** | 4 | -  | 0 | *  | * | 2 | 6  | Moderate |
| Suleiman et al., 2020 <sup>[82]</sup>    | * | - | - | *  | 2 | ** | 2 | *  | - | 1 | 5  | Moderate |
| Tayyib et al., 2020 <sup>[83]</sup>      | * | * | * | *  | 4 | ** | 2 | *  | * | 2 | 8  | High     |
| Thomas et al., 2020 <sup>[84]</sup>      | - | - | - | *  | 1 | *  | 1 | *  | * | 2 | 4  | Low      |
| Vally, 2020 <sup>[85]</sup>              | - | - | - | ** | 2 | ** | 2 | *  | * | 2 | 6  | Moderate |
| Z. M. Ahmed et al., 2020 <sup>[86]</sup> | * | * | * | ** | 5 | ** | 2 | ** | * | 3 | 10 | High     |

## REFERENCES

1. Wells GA, Shea B, O'Connell Da, et al. The Newcastle-Ottawa Scale (NOS) for assessing the quality of nonrandomised studies in meta-analyses [cited 2021 09/04/2021]. Available from: [http://www.ohri.ca/Programs/clinical\\_epidemiology/oxford.asp](http://www.ohri.ca/Programs/clinical_epidemiology/oxford.asp) accessed 09/04/2021 2021.
2. McPheeters ML, Kripalani S, Peterson NB, et al. Closing the quality gap: revisiting the state of the science (vol. 3: quality improvement interventions to address health disparities). *Evidence report/technology assessment* 2012(208.3):1-475.
3. Pelton M, Ciarletta M, Wisnousky H, et al. Rates and risk factors for suicidal ideation, suicide attempts and suicide deaths in persons with HIV: a systematic review and meta-analysis. *General Psychiatry* 2021;34(2):e100247. doi: 10.1136/gpsych-2020-100247
4. Shalash A, Roushdy T, Essam M, et al. Mental Health, Physical Activity, and Quality of Life in Parkinson's Disease During COVID-19 Pandemic. *Movement Disorders* 2020;35(7):1097-99. doi: <https://doi.org/10.1002/mds.28134>
5. Herzog R, Álvarez-Pasquin MJ, Díaz C, et al. Are healthcare workers' intentions to vaccinate related to their knowledge, beliefs and attitudes? A systematic review. *BMC Public Health* 2013;13:154. doi: 10.1186/1471-2458-13-154 [published Online First: 2013/02/21]
6. Abdel Jalil MH, Alsous MM, Hammad EA, et al. Perceived public stress among Jordanians during the covid-19 outbreak. *Disaster Medicine and Public Health Preparedness* 2020:1-5. doi: 10.1017/dmp.2020.328
7. Abdulah DM, Mohammed AA. The consequences of the COVID-19 pandemic on perceived stress in clinical practice: experience of doctors in Iraqi Kurdistan. *Romanian Journal of Internal Medicine* 2020;58(4):219-27. doi: 10.2478/rjim-2020-0020
8. Abolfotouh MA, Almutairi AF, Banimustafa AAA, et al. Perception and attitude of healthcare workers in Saudi Arabia with regard to Covid-19 pandemic and potential associated predictors. *BMC Infectious Diseases* 2020;20(1) doi: 10.1186/s12879-020-05443-3
9. Ahmad AR, Murad HR. The impact of social media on panic during the COVID-19 pandemic in iraqi kurdistan: Online questionnaire study. *Journal of Medical Internet Research* 2020;22(5):1-11. doi: 10.2196/19556
10. Al Issa H-E, Jaleel EM. Social isolation and psychological wellbeing: lessons from Covid-19. *Management Science Letters* 2021;11:609-18. doi: 10.5267/j.msl.2020.9.006
11. Al Omari O, Al Sabei S, Al Rawajfah O, et al. Prevalence and Predictors of Depression, Anxiety, and Stress among Youth at the Time of COVID-19: An Online Cross-Sectional Multicountry Study. *Depression Research and Treatment* 2020;2020(October) doi: 10.1155/2020/8887727
12. Al Sulais E, Mosli M, Alameel T. The psychological impact of COVID-19 pandemic on physicians in Saudi Arabia: A cross-sectional study. *Saudi Journal of Gastroenterology* 2020;26(5):249-55. doi: 10.4103/sjg.SJG\_174\_20
13. Alasousi LF, al Hammouri S, al Al-Abdulhadi S. Anxiety and media exposure during COVID-19 outbreak in Kuwait. *medRxiv* 2020 doi: 10.1101/2020.08.24.20180745
14. AlAteeq DA, Aljhani S, AlEesa D. Perceived stress among students in virtual classrooms during the COVID-19 outbreak in KSA. *Journal of Taibah University Medical Sciences* 2020;15(5):398-403. doi: 10.1016/j.jtumed.2020.07.004
15. AlAteeq DA, Aljhani S, Althiyabi I, et al. Mental health among healthcare providers during coronavirus disease (COVID-19) outbreak in Saudi Arabia. *Journal of Infection and Public Health* 2020;13(10):1432-37. doi: 10.1016/j.jiph.2020.08.013
16. Alatrany SSJ. COVID-19 Related Stigma, Examining the View of the General Public of Stigma toward People with COVID-19 in Iraq. *International Journal of Psychosocial Rehabilitation* 2020;24(5):7108-15. doi: 10.37200/ijpr/v24i5/pr2020720

17. Alenazi TH, BinDhim NF, Alenazi MH, et al. Prevalence and predictors of anxiety among healthcare workers in Saudi Arabia during the COVID-19 pandemic. *Journal of Infection and Public Health* 2020;13(11):1645-51. doi: 10.1016/j.jiph.2020.09.001
18. Al-Hanawi MK, Mwale ML, Alshareef N, et al. Psychological distress amongst health workers and the general public during the COVID-19 pandemic in Saudi Arabia. *Risk Management and Healthcare Policy* 2020;13:733-42. doi: 10.2147/RMHP.S264037
19. Al-Hashel JY, Ismail II. Impact of coronavirus disease 2019 (COVID-19) pandemic on patients with migraine: a web-based survey study. *The journal of headache and pain* 2020;21(1):115-15. doi: 10.1186/s10194-020-01183-6
20. Ali H, Ismail AA, Abdalwahab A. Mental stress in anesthesia and intensive care physicians during COVID-19 outbreak. *Anesthesiology and Pain Medicine* 2020;10(5):1-6. doi: 10.5812/aapm.106623
21. Alkhamees AA, Alrashed SA, Alzunaydi AA, et al. The psychological impact of COVID-19 pandemic on the general population of Saudi Arabia. *Comprehensive Psychiatry* 2020;102:152192-92. doi: 10.1016/j.comppsy.2020.152192
22. Alkhotani A, Siddiqui MI, Almuntashri F, et al. The effect of COVID-19 pandemic on seizure control and self-reported stress on patient with epilepsy. *Epilepsy and Behavior* 2020;112:107323-23. doi: 10.1016/j.yebeh.2020.107323
23. Almater A, Tobaigy M, Younis A, et al. Effect of 2019 coronavirus pandemic on ophthalmologists practicing in Saudi Arabia: A psychological health assessment. *Middle East African Journal of Ophthalmology* 2020;27(2):79-85. doi: 10.4103/meajo.MEAJO\_220\_20
24. Al-Musharaf S. Prevalence and predictors of emotional eating among healthy young Saudi women during the COVID-19 pandemic. *Nutrients* 2020;12(10):1-17. doi: 10.3390/nu12102923
25. Alnasrallah M, Alshehab I. Geographic Disparities in Stress Levels during the COVID-19 Pandemic in Kuwait. *Papers in Applied Geography* 2020;6(4):449-59. doi: 10.1080/23754931.2020.1807396
26. Al-Qahtani AM, Elgzar WT, Ibrahim HAF. COVID-19 Pandemic: Psycho-social consequences during the social distancing period among Najran city population. *Psychiatria Danubina* 2020;32(2):280-86. doi: 10.24869/PSYD.2020.280
27. Alrubaiee GG, Al-Qalah TAH, Al-Aawar MSA. Knowledge, attitudes, anxiety, and preventive behaviours towards COVID-19 among health care providers in Yemen: an online cross-sectional survey. *BMC Public Health* 2020;20(1):1-11. doi: 10.1186/s12889-020-09644-y
28. Alsaqri SH, Alkwiese MJ, Aldalaykeh MK, et al. Anxiety among the general population during Coronavirus-19 disease in Saudi Arabia: Implications for a mental support program. *medRxiv* 2020 doi: 10.1101/2020.05.07.20090225
29. Alshekaili M, Hassan W, Al Said N, et al. Factors associated with mental health outcomes across healthcare settings in Oman during COVID-19: Frontline versus non-frontline healthcare workers. *BMJ Open* 2020;10(10):1-7. doi: 10.1136/bmjopen-2020-042030
30. Al-Tammemi AaB, Akour A, Alfalah L. Is It Just About Physical Health? An Online Cross-Sectional Study Exploring the Psychological Distress Among University Students in Jordan in the Midst of COVID-19 Pandemic. *Frontiers in Psychology* 2020;11(November):1-11. doi: 10.3389/fpsyg.2020.562213
31. Aly MM, Elchaghaby MA. Impact of novel coronavirus disease (COVID-19) on Egyptian dentists' fear and dental practice (a cross-sectional survey). *BDJ Open* 2020;6(1):1-5. doi: 10.1038/s41405-020-00047-0
32. Ammar A, Chtourou H, Boukhris O, et al. Social participation and life satisfaction of peoples during the COVID-19 home confinement : the ECLB-COVID19 multicenter study Correspondant Author : Dr . Achraf Ammar , Institute for Sports Science , Otto-von-Guericke University Magdeburg. *medRxiv* 2020



33. Arafa A, Mohamed A, Saleh L, et al. Psychological Impacts of the COVID-19 Pandemic on the Public in Egypt. *Community Mental Health Journal* 2020 doi: 10.1007/s10597-020-00701-9
34. Arafa A, Mohammed Z, Mahmoud O, et al. Depressed, anxious, and stressed: What have healthcare workers on the frontlines in Egypt and Saudi Arabia experienced during the COVID-19 pandemic? *Journal of Affective Disorders* 2021;278(May 2020):365-71. doi: 10.1016/j.jad.2020.09.080
35. Azizi A, Achak D, Aboudi K, et al. Health-related quality of life and behavior-related lifestyle changes due to the COVID-19 home confinement: Dataset from a Moroccan sample. *Data in Brief* 2020;32 doi: 10.1016/j.dib.2020.106239
36. Badahdah A, Khamis F, Al Mahiyjari N, et al. The mental health of health care workers in Oman during the COVID-19 pandemic. *International Journal of Social Psychiatry* 2020 doi: 10.1177/0020764020939596
37. Blbas HTA, Aziz KF, Nejad SH, et al. Phenomenon of depression and anxiety related to precautions for prevention among population during the outbreak of COVID-19 in Kurdistan Region of Iraq: based on questionnaire survey. *Journal of Public Health (Germany)* 2020 doi: 10.1007/s10389-020-01325-9
38. Burhamah W, AlKhayyat A, Oroszlányová M, et al. The psychological burden of the COVID-19 pandemic and associated lockdown measures: Experience from 4000 participants. *Journal of Affective Disorders* 2020;277:977-85. doi: <https://doi.org/10.1016/j.jad.2020.09.014>
39. Drissi N, Alhmoudi A, Nuaimi HA, et al. Investigating the impact of COVID-19 lockdown on the psychological health of university students and their attitudes toward mobile mental health solutions: Two-part questionnaire study. *JMIR Formative Research* 2020;4(10):1-14. doi: 10.2196/19876
40. El Keshky MES, Alsabban AM, Basyouni SS. The psychological and social impacts on personal stress for residents quarantined for COVID-19 in Saudi Arabia. *Archives of Psychiatric Nursing* 2020 doi: 10.1016/j.apnu.2020.09.008
41. Elhadi M, Msherghi A, Elgzairi M, et al. Psychological status of healthcare workers during the civil war and COVID-19 pandemic: A cross-sectional study. *Journal of Psychosomatic Research* 2020;137(August) doi: 10.1016/j.jpsychores.2020.110221
42. Elkholy H, Tawfik F, Ibrahim I, et al. Mental health of frontline healthcare workers exposed to COVID-19 in Egypt: A call for action. *International Journal of Social Psychiatry* 2020 doi: 10.1177/0020764020960192
43. El-Zoghby SM, Soltan EM, Salama HM. Impact of the COVID-19 Pandemic on Mental Health and Social Support among Adult Egyptians. *Journal of Community Health* 2020;45(4):689-95. doi: 10.1007/s10900-020-00853-5
44. Farrell T, Reagu S, Mohan S, et al. The impact of the COVID-19 pandemic on the perinatal mental health of women. *Journal of Perinatal Medicine* 2020;48(9):971-76. doi: 10.1515/jpm-2020-0415
45. Fawaz M, Samaha A. COVID-19 quarantine: Post-traumatic stress symptomatology among Lebanese citizens. *International Journal of Social Psychiatry* 2020;66(7):666-74. doi: 10.1177/0020764020932207
46. Fekih-Romdhane F, Ghrissi F, Abbassi B, et al. Prevalence and predictors of PTSD during the COVID-19 pandemic: Findings from a Tunisian community sample. *Psychiatry Research* 2020;290(June) doi: 10.1016/j.psychres.2020.113131
47. Fekih-Romdhane F, Snene H, Jebri A, et al. Psychological impact of the Pandemic COVID-19 Outbreak Among Medical Residents in Tunisia. *Asian Journal of Psychiatry* 2020;53(August) doi: 10.1016/j.ajp.2020.102349

48. Alyami HS, Naser AY, Dahmash EZ, et al. Depression and anxiety during 2019 coronavirus disease pandemic in Saudi Arabia: A cross-sectional study. *medRxiv* 2020;966(5) doi: 10.1101/2020.05.09.20096677
49. Haider AS, Al-Salman S. Dataset of Jordanian university students' psychological health impacted by using e-learning tools during COVID-19. *Data in Brief* 2020;32(July) doi: 10.1016/j.dib.2020.106104
50. Halayem S, Sayari N, Cherif W, et al. How Tunisian physicians of public health hospitals deal with COVID-19 pandemic: Perceived stress and coping strategies. *Psychiatry and Clinical Neurosciences* 2020;74(9):496-97. doi: 10.1111/pcn.13097
51. Hamdan Mansour A, Al Shibi AN, Khalifeh AH, et al. Health-care workers' knowledge and management skills of psychosocial and mental health needs and priorities of individuals with COVID-19. *Mental Health and Social Inclusion* 2020;24(3):135-44. doi: 10.1108/MHSI-04-2020-0022
52. Hawari FI, Obeidat NA, Dodin YI, et al. The inevitability of Covid-19 related distress among healthcare workers: Findings from a low caseload country under lockdown. *medRxiv* 2020 doi: 10.1101/2020.06.14.20130724
53. HENDY A, ABOZEID A, SALLAM G, et al. Predictive factors affecting stress among nurses providing care at COVID-19 isolation hospitals at Egypt. *Nursing Open* 2021;8(1):498-505. doi: 10.1002/nop2.652
54. Iqbal Y, Al Abdulla MA, Albrahim S, et al. Psychiatric presentation of patients with acute SARS-CoV-2 infection: a retrospective review of 50 consecutive patients seen by a consultation-liaison psychiatry team. *BJPsych Open* 2020;6(5) doi: 10.1192/bjo.2020.85
55. Jahrami H, BaHammam AS, AlGahtani H, et al. The examination of sleep quality for frontline healthcare workers during the outbreak of COVID-19. *Sleep and Breathing* 2020;2019 doi: 10.1007/s11325-020-02135-9
56. Janati Idrissi A, Lamkaddem A, Benouajjit A, et al. Sleep quality and mental health in the context of COVID-19 pandemic and lockdown in Morocco. *Sleep Medicine* 2020;74(August):248-53. doi: 10.1016/j.sleep.2020.07.045
57. Joseph R, Alshayban D, Lucca JM, et al. The immediate psychological response of the general population in Saudi Arabia during COVID-19 pandemic: A cross-sectional study. *medRxiv* 2020:1-27. doi: 10.1101/2020.06.19.20135533
58. Ahmed MA, Jouhar R, Ahmed N, et al. Fear and practice modifications among dentists to combat novel coronavirus disease (COVID-19) outbreak. *International Journal of Environmental Research and Public Health* 2020;17(8) doi: 10.3390/ijerph17082821
59. Alyami M, Henning M, Krägeloh CU, et al. Psychometric Evaluation of the Arabic Version of the Fear of COVID-19 Scale. *International Journal of Mental Health and Addiction* 2020(May) doi: 10.1007/s11469-020-00316-x
60. Temsah MH, Alhuzaimi AN, Alamro N, et al. Knowledge, Attitudes, and Practices of Healthcare Workers during the Early COVID-19 Pandemic in a Main, Academic Tertiary Care Centre in Saudi Arabia. *Epidemiology and Infection* 2020 doi: 10.1017/S0950268820001958
61. Temsah M-H, Al-Sohime F, Alamro N, et al. The psychological impact of COVID-19 pandemic on health care workers in a MERS-CoV endemic country. *Journal of Infection and Public Health* 2020;13(6):877-82. doi: <https://doi.org/10.1016/j.jiph.2020.05.021>
62. Madani A, Boutebal SE, Bryant CR. The psychological impact of confinement linked to the coronavirus epidemic COVID-19 in Algeria. *International Journal of Environmental Research and Public Health* 2020;17(10) doi: 10.3390/ijerph17103604
63. Maraqa B, Nazzal Z, Zink T. Palestinian Health Care Workers' Stress and Stressors During COVID-19 Pandemic: A Cross-Sectional Study. *Journal of Primary Care and Community Health* 2020;11 doi: 10.1177/2150132720955026

64. Metwally AM, El-Sonbaty MM, Abdel-Latif GA, et al. Common phobias among Egyptian primary schoolchildren: An emergency trigger for panic disorder due to corona pandemic. *Open Access Macedonian Journal of Medical Sciences* 2020;8(T1):3-11. doi: 10.3889/oamjms.2020.4766
65. Mohamed-Azzam Zakout Y, Saud Alreshidi F, Mustafa Elsaid R, et al. The magnitude of COVID-19 related stress, anxiety and depression associated with intense mass media coverage in Saudi Arabi. *AIMS Public Health* 2020;7(3):664-78. doi: 10.3934/publichealth.2020052
66. Mosli M, Alourfi M, Alamoudi A, et al. A cross-sectional survey on the psychological impact of the COVID-19 pandemic on inflammatory bowel disease patients in Saudi Arabia. *Saudi Journal of Gastroenterology* 2020;26(5):263-71. doi: 10.4103/sjg.SJG\_220\_20
67. Naser AY, Dahmash EZ, Al-Rousan R, et al. Mental health status of the general population, healthcare professionals, and university students during 2019 coronavirus disease outbreak in Jordan: A cross-sectional study. *Brain and Behavior* 2020;10(8):1-13. doi: 10.1002/brb3.1730
68. Öcal A, Cvetković VM, Baytiyeh H, et al. Public reactions to the disaster COVID-19: a comparative study in Italy, Lebanon, Portugal, and Serbia. *Geomatics, Natural Hazards and Risk* 2020;11(1):1864-85. doi: 10.1080/19475705.2020.1811405
69. Olaimat AN, Aolymat I, Elshoryi N, et al. Attitudes, Anxiety, and Behavioral Practices Regarding COVID-19 among University Students in Jordan: A Cross-Sectional Study. *American Journal of Tropical Medicine and Hygiene* 2020;103(3):1177-83. doi: 10.4269/ajtmh.20-0418
70. Rahali K, Abidli Z, Khohmimidi A, et al. Ibn tofail'suniversity students' satisfaction evaluation towards distance learning and its impacts on the students' mental health during the covid 19 confinement. *Bangladesh Journal of Medical Science* 2020;19(Special issue):S 51-S 57. doi: 10.3329/bjms.v19i0.48166
71. Saddik B, Hussein A, Albanna A, et al. Assessing the influence of parental anxiety on childhood anxiety during the COVID-19 pandemic in the United Arab Emirates. *medRxiv* 2020 doi: 10.1101/2020.06.11.20128371
72. Saddik B, Hussein A, Sharif-Askari FS, et al. Increased levels of anxiety among medical and non-medical university students during the COVID-19 pandemic in the United Arab Emirates. *medRxiv* 2020 doi: 10.1101/2020.05.10.20096933
73. Said RM, El-Shafei DA. Occupational stress, job satisfaction, and intent to leave: nurses working on front lines during COVID-19 pandemic in Zagazig City, Egypt. *Environmental Science and Pollution Research* 2020;19 doi: 10.1007/s11356-020-11235-8
74. Sallam M, Dababseh D, Yaseen A, et al. Conspiracy beliefs are associated with lower knowledge and higher anxiety levels regarding COVID-19 among students at the University of Jordan. *medRxiv* 2020 doi: 10.1101/2020.04.21.20064147
75. Sallam M, Dababseh D, Yaseen A, et al. COVID-19 misinformation: Mere harmless delusions or much more? A knowledge and attitude cross-sectional study among the general public residing in Jordan. *PLoS ONE* 2020;15(12 December):1-18. doi: 10.1371/journal.pone.0243264
76. Sameer AS, Khan MA, Nissar S, et al. Assessment of Mental Health and Various Coping Strategies among general population living Under Imposed COVID-Lockdown Across world: A Cross-Sectional Study. *Ethics, Medicine and Public Health* 2020;15(January):19-21. doi: 10.1016/j.jemep.2020.100571
77. Samrah SM, Al-Mistarehi AH, Aleshawi AJ, et al. Depression and coping among covid-19-infected individuals after 10 days of mandatory in-hospital quarantine, irbid, jordan. *Psychology Research and Behavior Management* 2020;13:823-30. doi: 10.2147/PRBM.S267459
78. Sediri S, Zgueb Y, Ouanes S, et al. Women's mental health: acute impact of COVID-19 pandemic on domestic violence. *Archives of Women's Mental Health* 2020 doi: 10.1007/s00737-020-01082-4

79. Sfendla A, Hadrya F. Factors Associated with Psychological Distress and Physical Activity during the COVID-19 Pandemic. *Health Security* 2020;18(6):444-53. doi: 10.1089/hs.2020.0062
80. Shahrour G, Dardas LA. Acute stress disorder, coping self-efficacy and subsequent psychological distress among nurses amid COVID-19. *Journal of Nursing Management* 2020;28(7):1686-95. doi: 10.1111/jonm.13124
81. Slimani M, Paravlic A, Mbarek F, et al. The Relationship Between Physical Activity and Quality of Life During the Confinement Induced by COVID-19 Outbreak: A Pilot Study in Tunisia. *Frontiers in Psychology* 2020;11(August) doi: 10.3389/fpsyg.2020.01882
82. Suleiman A, Bsisu I, Guzu H, et al. Preparedness of frontline doctors in Jordan healthcare facilities to COVID-19 outbreak. *International Journal of Environmental Research and Public Health* 2020;17(9) doi: 10.3390/ijerph17093181
83. Tayyib NA, Alsolami FJ. Measuring the extent of stress and fear among Registered Nurses in KSA during the COVID-19 Outbreak. *Journal of Taibah University Medical Sciences* 2020;15(5):410-16. doi: 10.1016/j.jtumed.2020.07.012
84. Thomas J, Barbato M. Positive religious coping and mental health among christians and muslims in response to the covid-19 pandemic. *Religions* 2020;11(10):1-13. doi: 10.3390/rel11100498
85. Vally Z. Public perceptions, anxiety and the perceived efficacy of health-protective behaviours to mitigate the spread of the SARS-Cov-2/ COVID-19 pandemic. *Public Health* 2020;187:67-73. doi: 10.1016/j.puhe.2020.08.002
86. Ahmed ZM, Khalil MF, Kohail AM, et al. The Prevalence and Predictors of Post-Stroke Depression and Anxiety During COVID-19 Pandemic. *Journal of Stroke and Cerebrovascular Diseases* 2020;29(12):105315-15. doi: 10.1016/j.jstrokecerebrovasdis.2020.105315
